# Supplementary material
Source: PubMed Central journal article supplement (PMC2999517)
Supplement: supp_214_1_147__1.pdf [file supp_214_1_147__1.pdf]

# Diversity in a Novel Family of Peptide Toxins from an Unusual Cone Snail, *Conus californicus*

W. F. Gilly, T.A. Richmond, T. Duda, C. Elliger, Z. Lebaric, J. Schulz,  
J. P. Bingham and J. V. Sweedler

## Supplementary Material

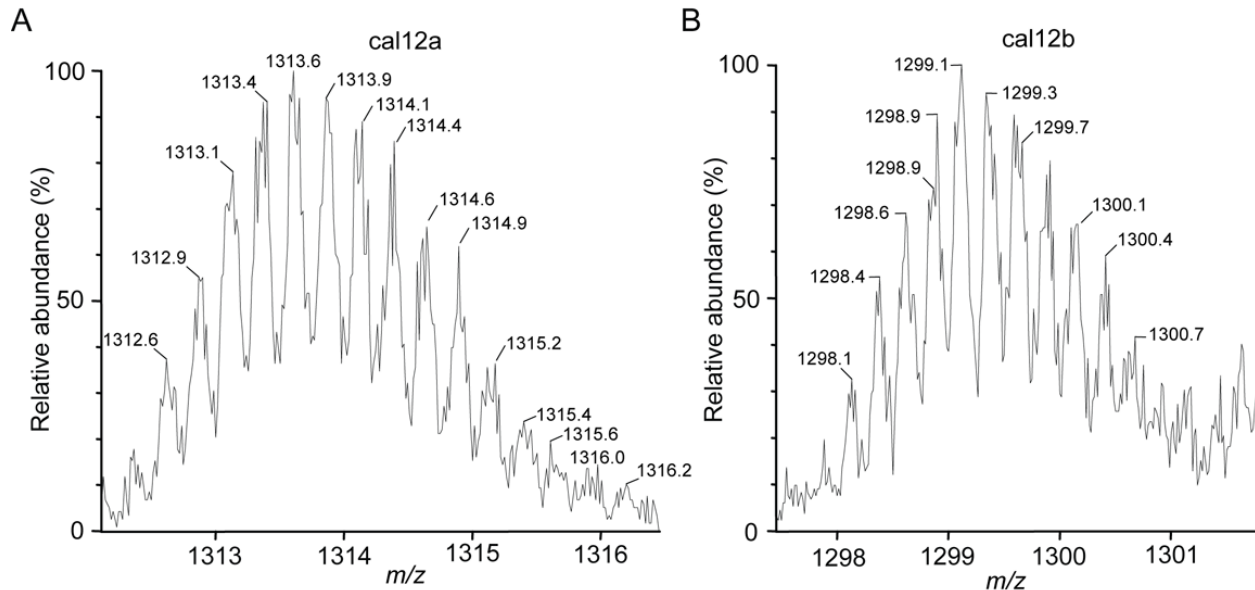

**S1.** Collected isotopic distributions of native peptides cal12a (panel A) and cal12b (panel B). Note that the actual data are displayed with  $+4$  ions, and the calculated spectra shows  $+1$  ions. Collected spectra exhibit isotopic profiles consistent with incorporation of multiple bromine atoms.
