# Supplementary material
Source: PubMed Central journal article supplement (PMC2999517)
Supplement: supp_214_1_147__2.pdf [file supp_214_1_147__2.pdf]

A

|            |      |        |        |              |              |         |           |                                                           |
|------------|------|--------|--------|--------------|--------------|---------|-----------|-----------------------------------------------------------|
|            | 1    | 17     | 21 23  | 37 38 40     | 45           |         |           |                                                           |
| Cal12.1.1a | DVCD | SLVGGH | CIHNGC | WCDQEAP      | HGNCCD       | TDGCTAA | WWCPG     | TKWD                                                      |
| cal12a     | DVCD | SLVGGH | CIHNGC | <u>W</u> CDQ | $\gamma$ AOH | GNC     | CDTDGCTAA | <u>W</u> <u>W</u> COG <u>T</u> <u>K</u> <u>W</u> <u>D</u> |

|                             |               |                      |
|-----------------------------|---------------|----------------------|
| unmodified average mass     | 4869.4        |                      |
| disulfide bonds (4)         | -8.0          |                      |
| gamma-carboxyglutamate (1)  | +44.0         | (E21)                |
| hydroxyproline residues (2) | +32.0         | (P23, P40)           |
| 6-bromotryptophan (4)       | <u>+315.6</u> | (W17, W37, W38, W44) |
| Predicted final mass        | 5253          |                      |
| Observed mass               | 5253          |                      |

B

|            |      |        |        |              |        |         |           |                                                           |
|------------|------|--------|--------|--------------|--------|---------|-----------|-----------------------------------------------------------|
|            | 1    | 17     | 23     | 37 38 40     | 45     |         |           |                                                           |
| Cal12.1.1b | DVCD | SLVGGH | CIHNGC | WCDQDAP      | HGNCCD | TDGCTAA | WWCPG     | TKWD                                                      |
| cal12b     | DVCD | SLVGGH | CIHNGC | <u>W</u> CDQ | DAOH   | GNC     | CDTDGCTAA | <u>W</u> <u>W</u> COG <u>T</u> <u>K</u> <u>W</u> <u>D</u> |

|                             |               |                      |
|-----------------------------|---------------|----------------------|
| unmodified average mass     | 4855.4        |                      |
| disulfide bonds (4)         | -8.0          |                      |
| hydroxyproline residues (2) | +32.0         | (P23, P40)           |
| 6-bromotryptophan (4)       | <u>+315.6</u> | (W17, W37, W38, W44) |
| Predicted final mass        | 5195          |                      |
| Observed mass               | 5194          |                      |

**S2.** Matching of the primary structure of peptides predicted by cDNAs Cal12.1.1a (panel A) and B (panel B) to the actual masses of the mature, processed toxins cal12a and cal12b as observed with MS analysis. This was accomplished by informative addition/subtraction of masses associated with specific PTMs. W = bromotryptophan; O = hydroxyproline; C = non-specifically disulfide-bonded cysteine;  $\gamma$  = Gla (gamma-carboxyglutamic acid).
