# Supplementary material
Source: PubMed Central journal article supplement (PMC2999517)
Supplement: supp_214_1_147__3.pdf [file supp_214_1_147__3.pdf]

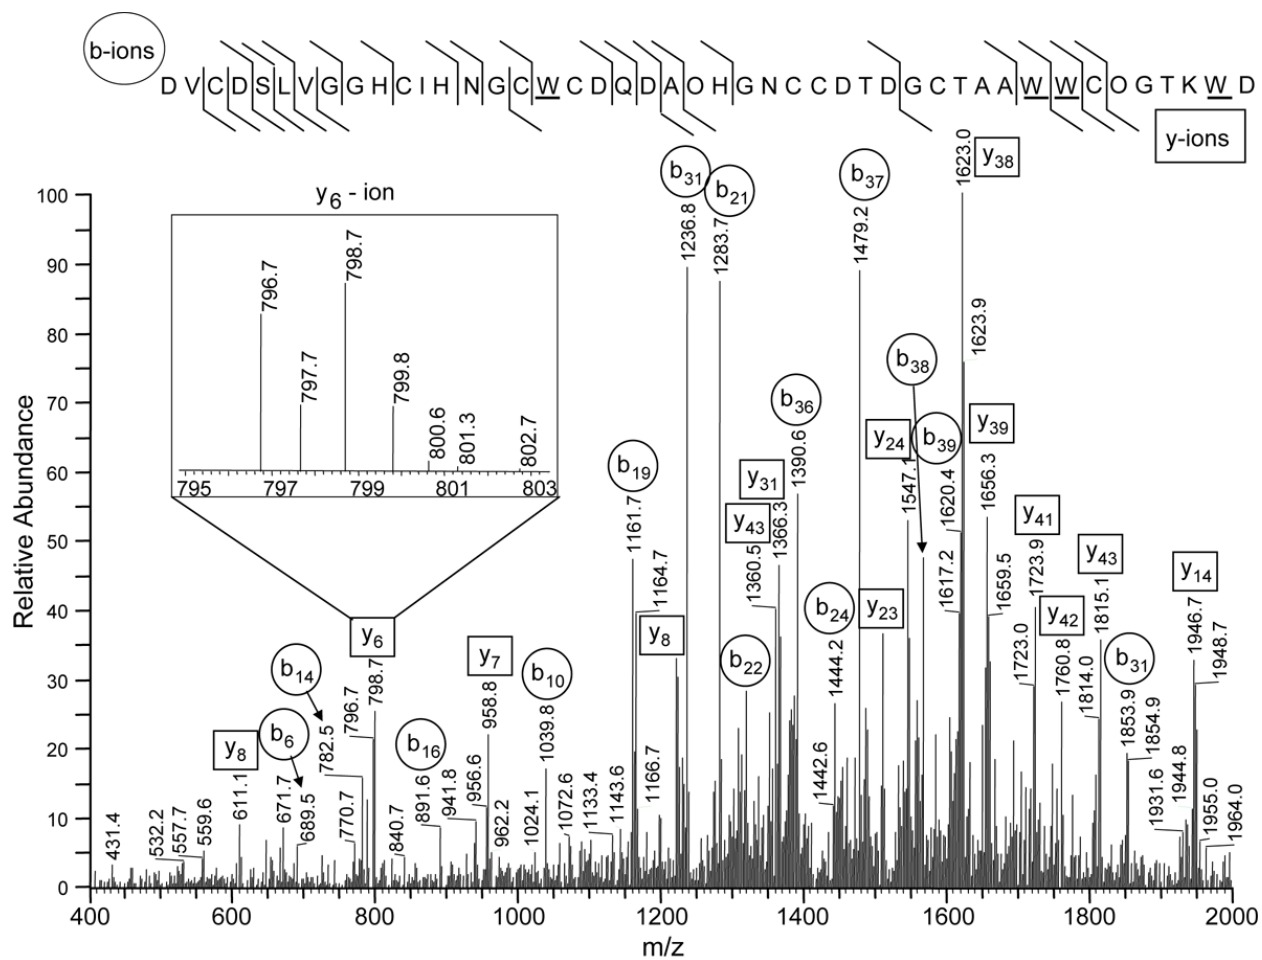

**Figure S3.** NSI fragmentation spectra of ion 1415<sup>+4</sup> derived from reduced and alkylated cal12.b. Excellent coverage of the peptide is exhibited with the b and y ion series. The inset shows the y<sub>6</sub> ion showing the bromine isotopic distribution. C = cysteine with carbamidomethyl group. W = bromotryptophan. O = hydroxyproline.
